# Supplementary material
Source: PubMed Central journal article supplement (PMC4078367)

# Supplementary Figure S4

**A**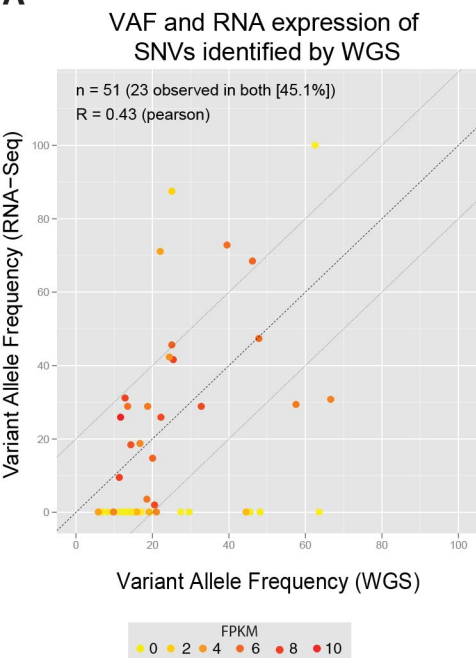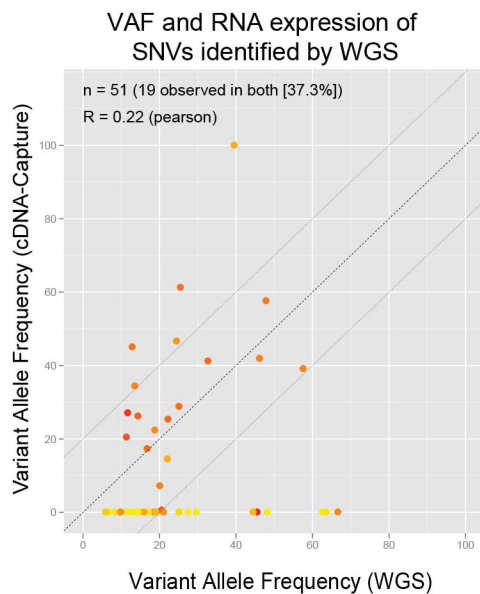

Expression of LUC6 Tier 1 Variants

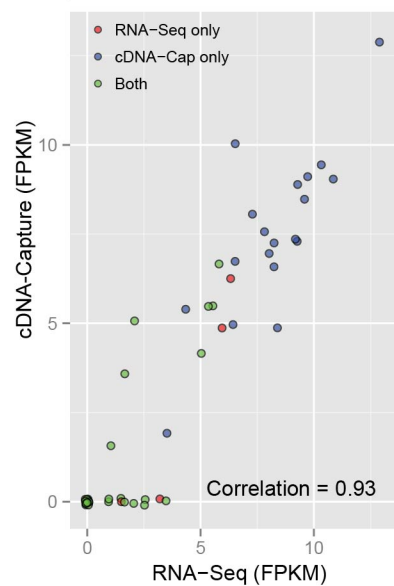**B**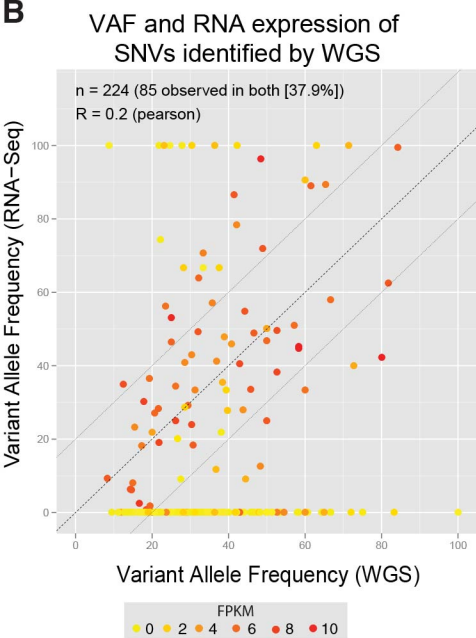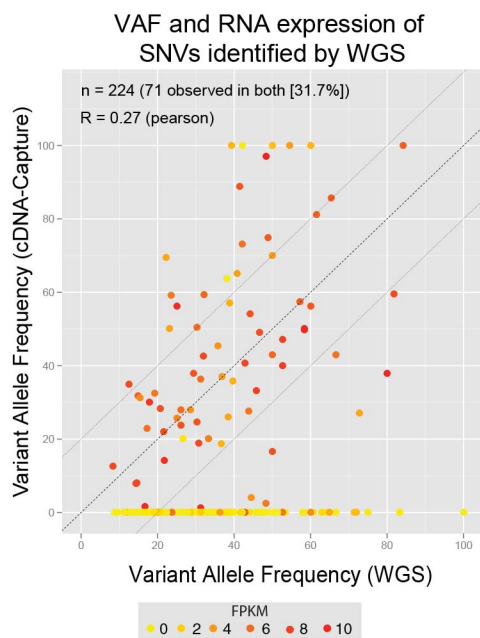

Expression of LUC13 Tier 1 Variants

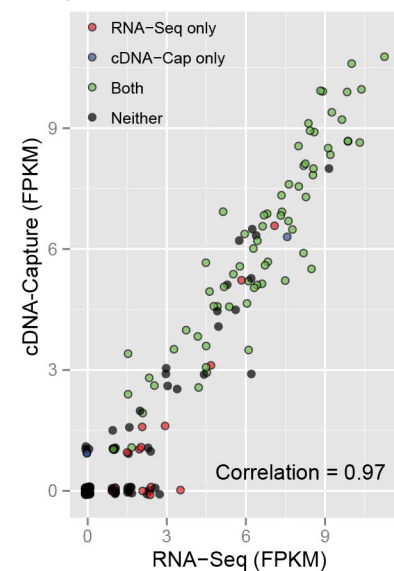**C**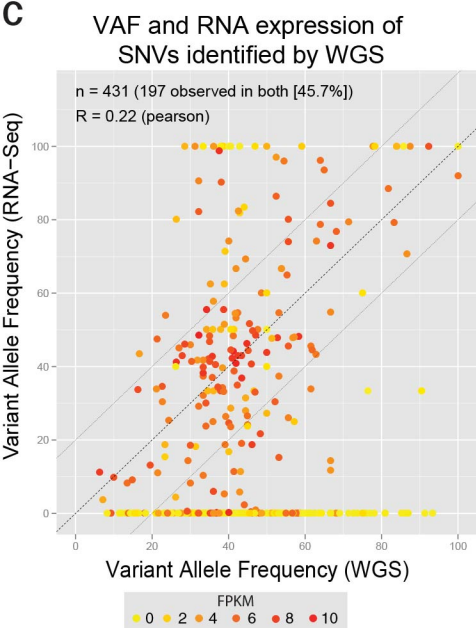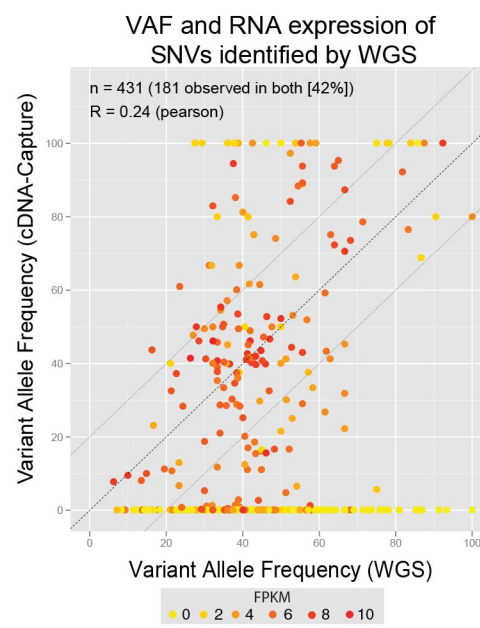

Expression of LUC20 Tier 1 Variants

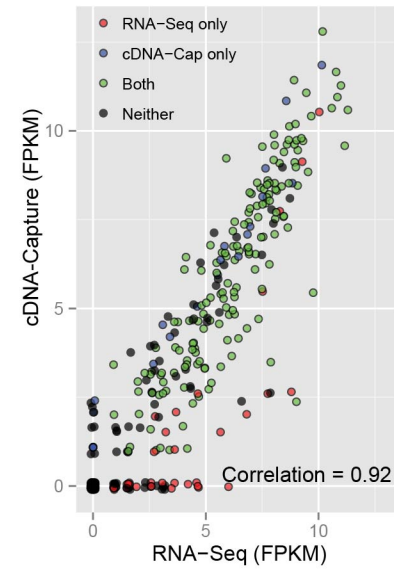

Supplement: mmc4.pdf [file mmc4.pdf]
