# Supplementary material
Source: PubMed Central journal article supplement (PMC4078367)

# Supplementary Figure S1

**A**

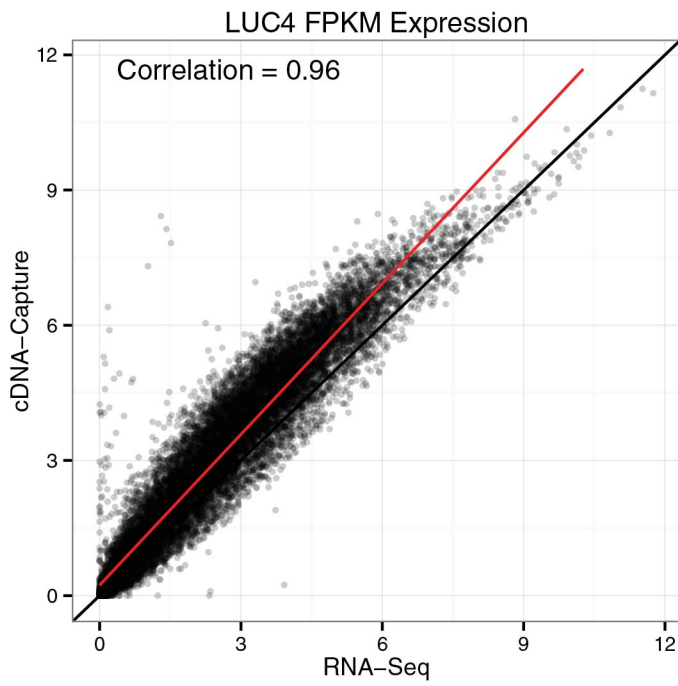

**B**

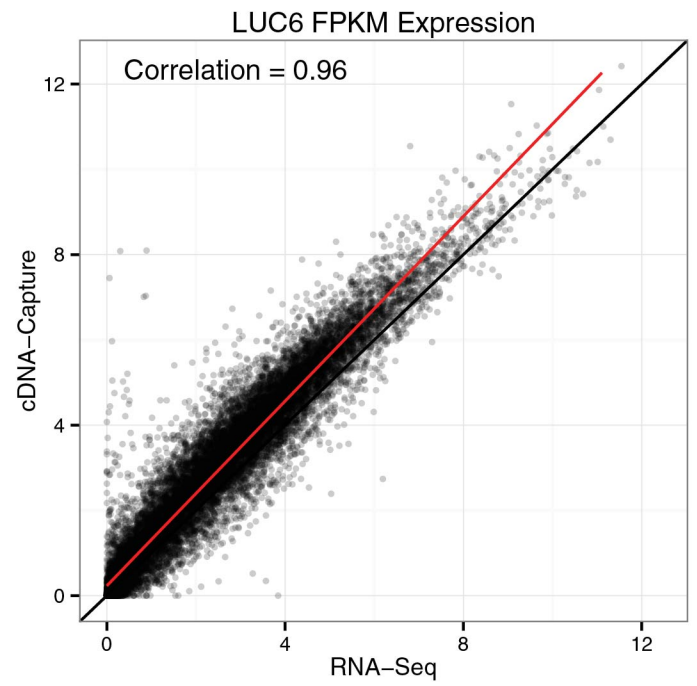

**C**

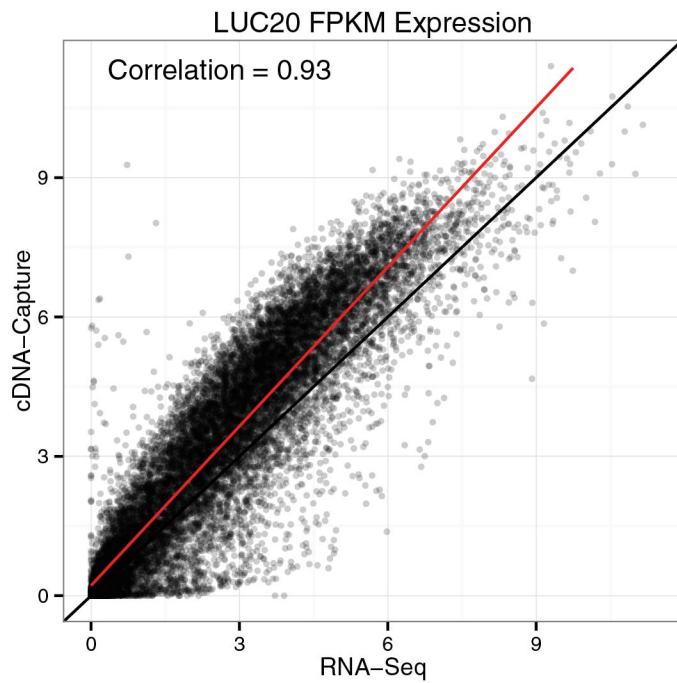

Supplement: mmc1.pdf [file mmc1.pdf]

# Supplementary Figure S2

**A****LUC4**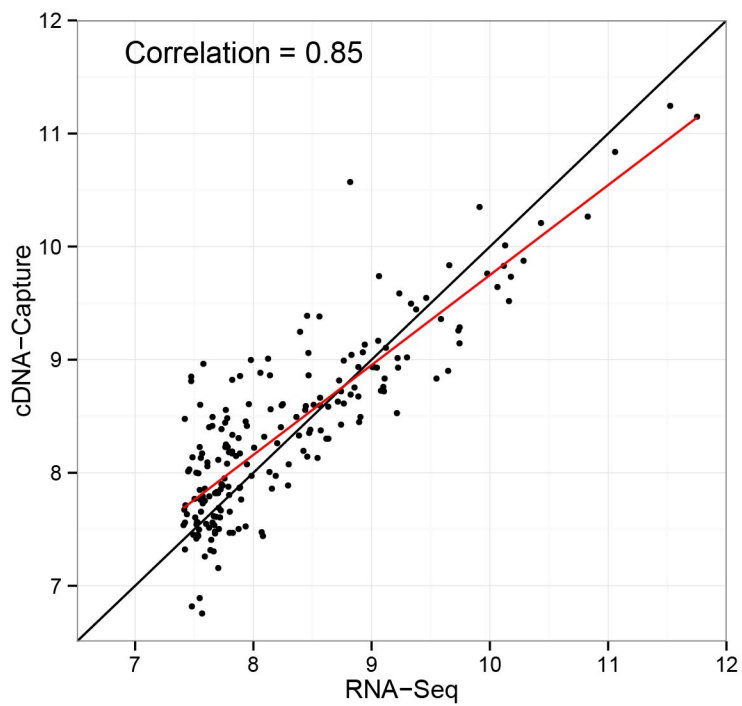**B****LUC6**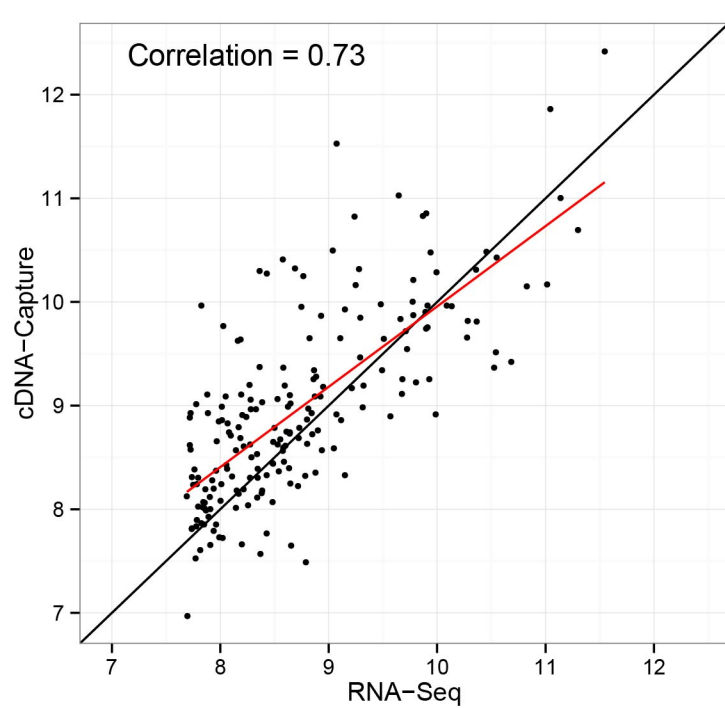**C****LUC13**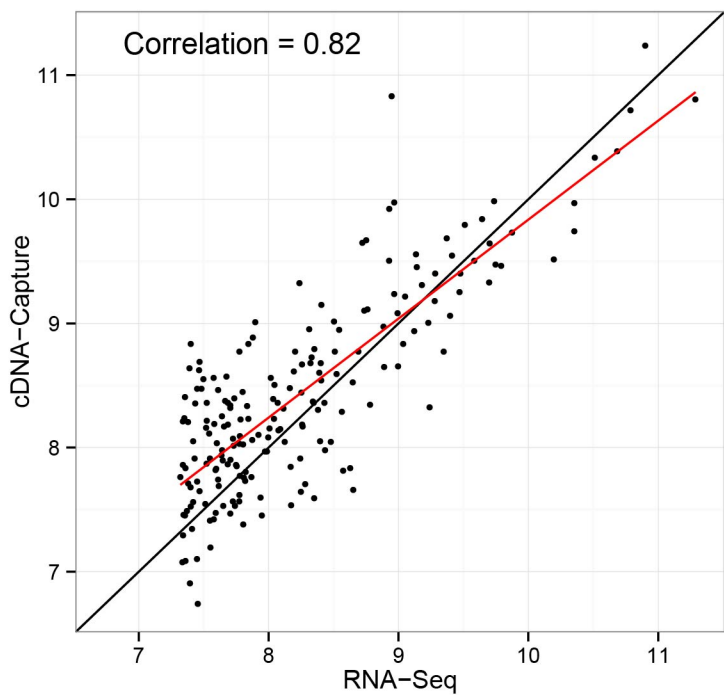**D****LUC20**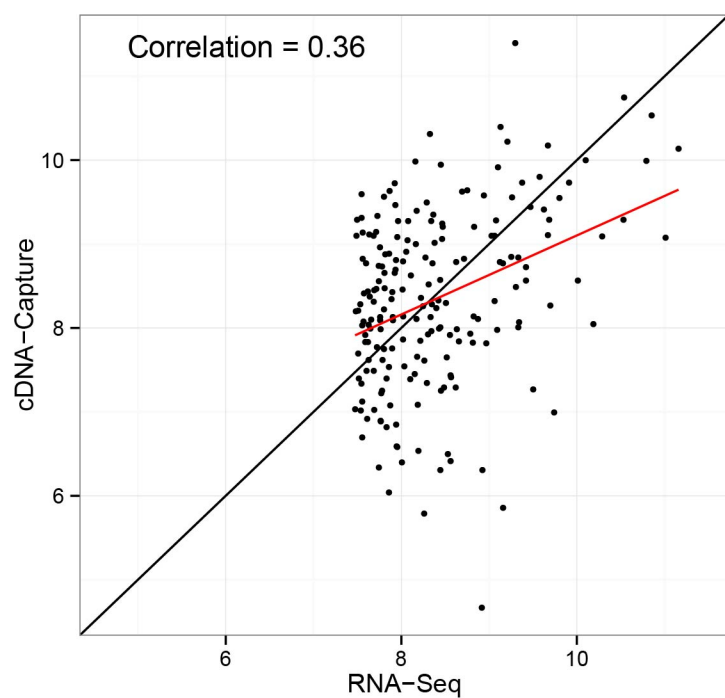

Supplement: mmc2.pdf [file mmc2.pdf]

# Supplementary Figure S3

A

Fresh Frozen

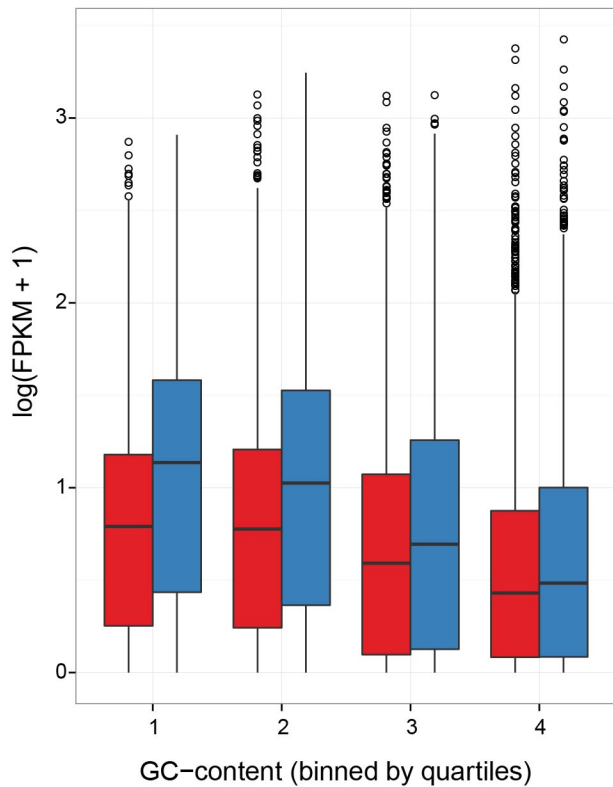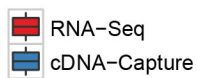

B

FFPE

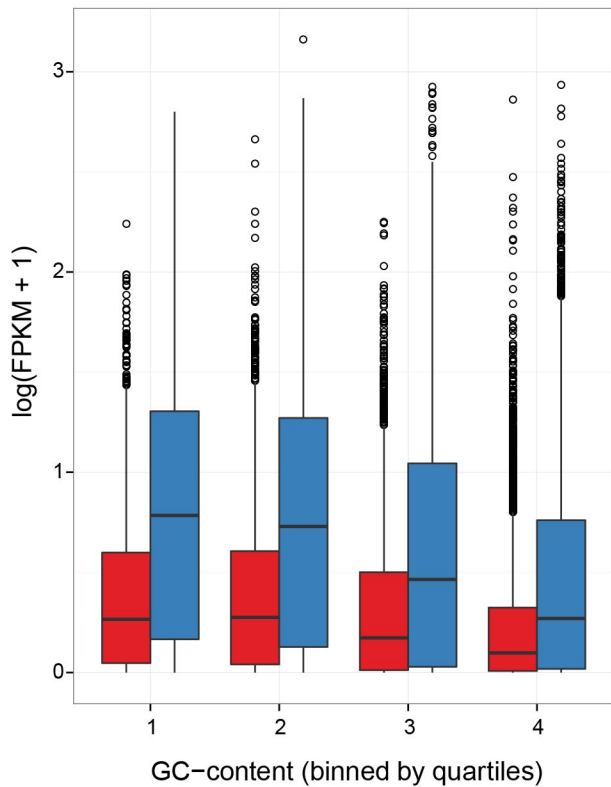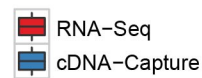

Supplement: mmc3.pdf [file mmc3.pdf]

# Supplementary Figure S5

**A**

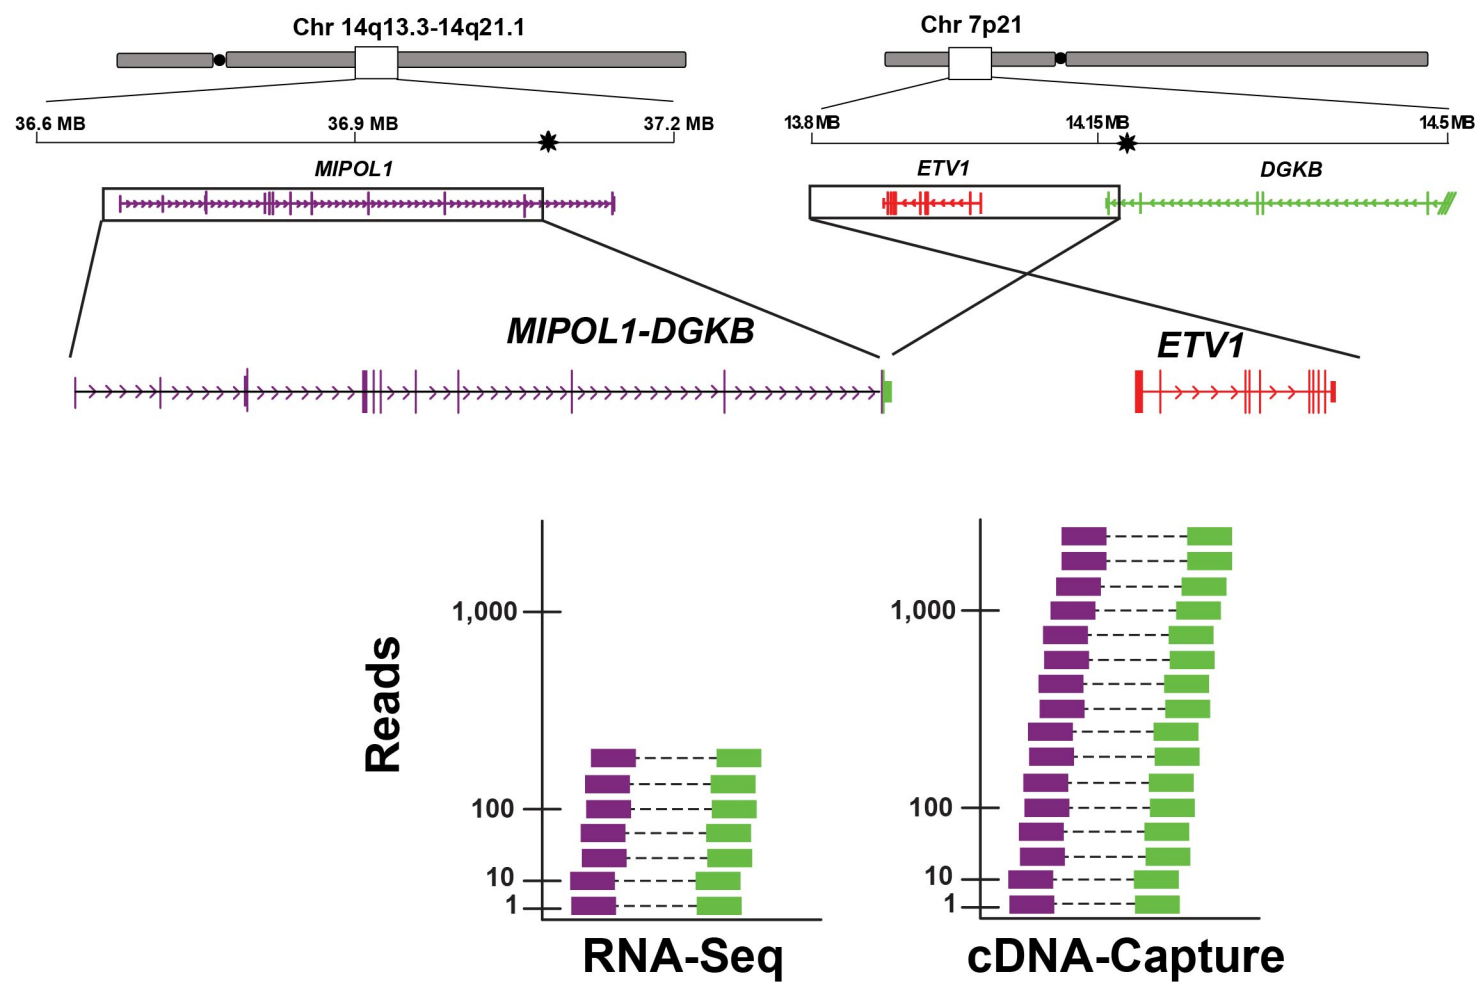

**B**

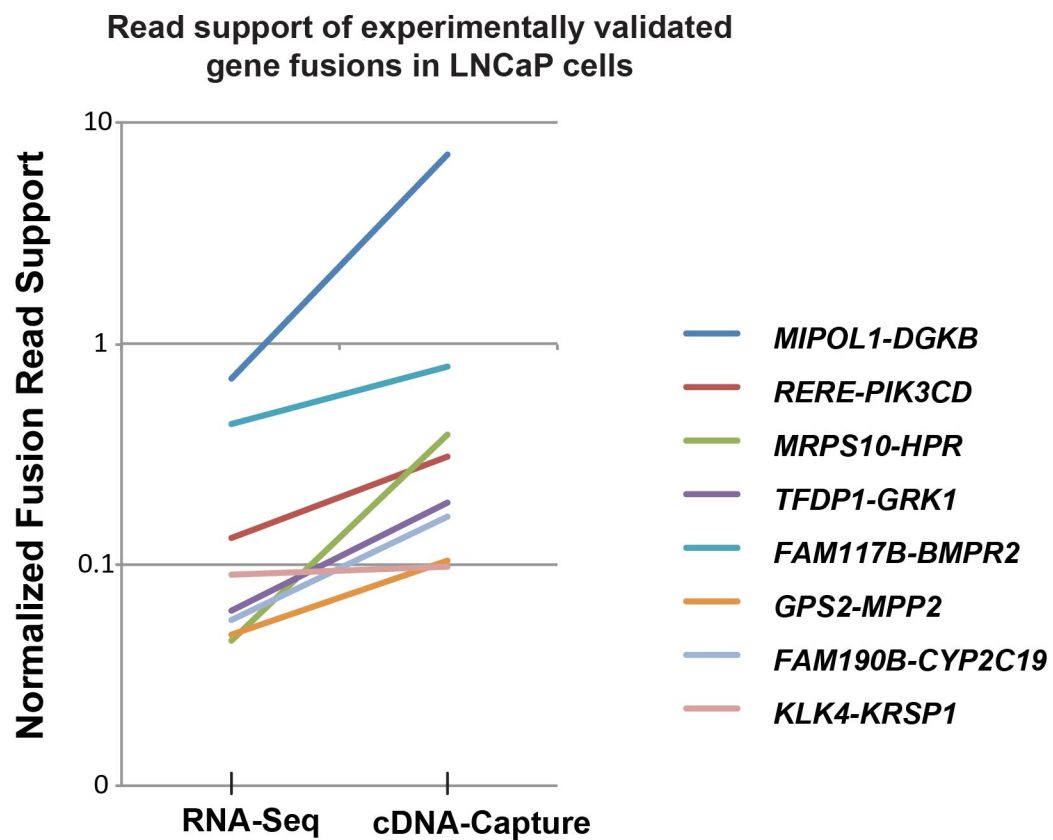

Supplement: mmc5.pdf [file mmc5.pdf]

# Supplementary Figure S6

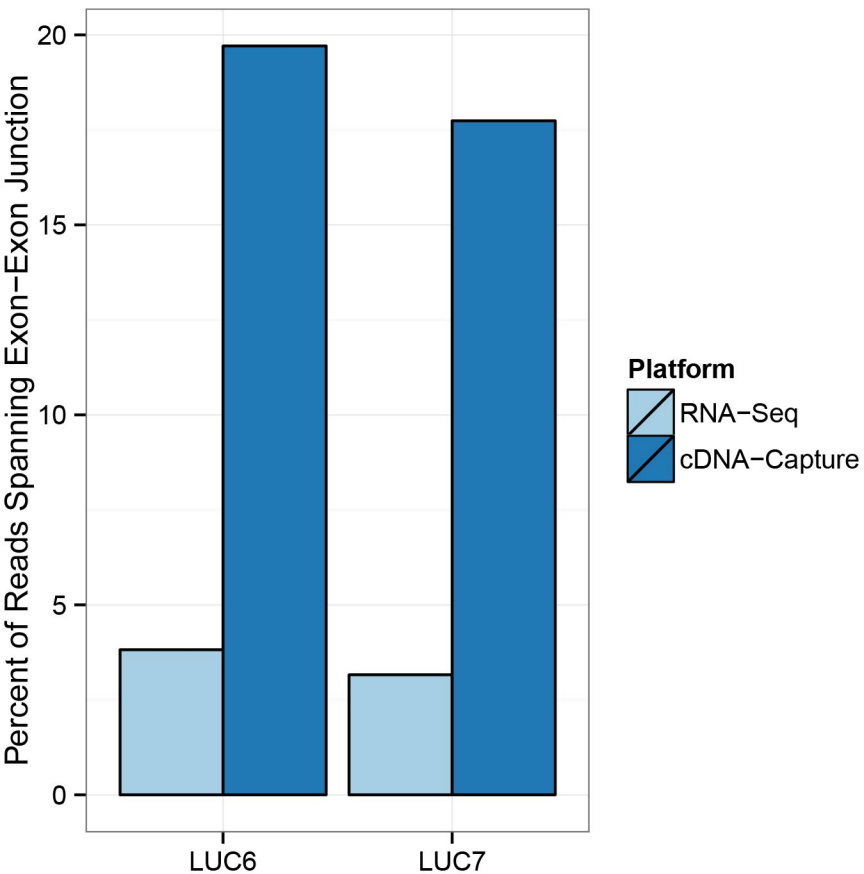

Supplement: mmc6.pdf [file mmc6.pdf]

# Supplementary Figure S7

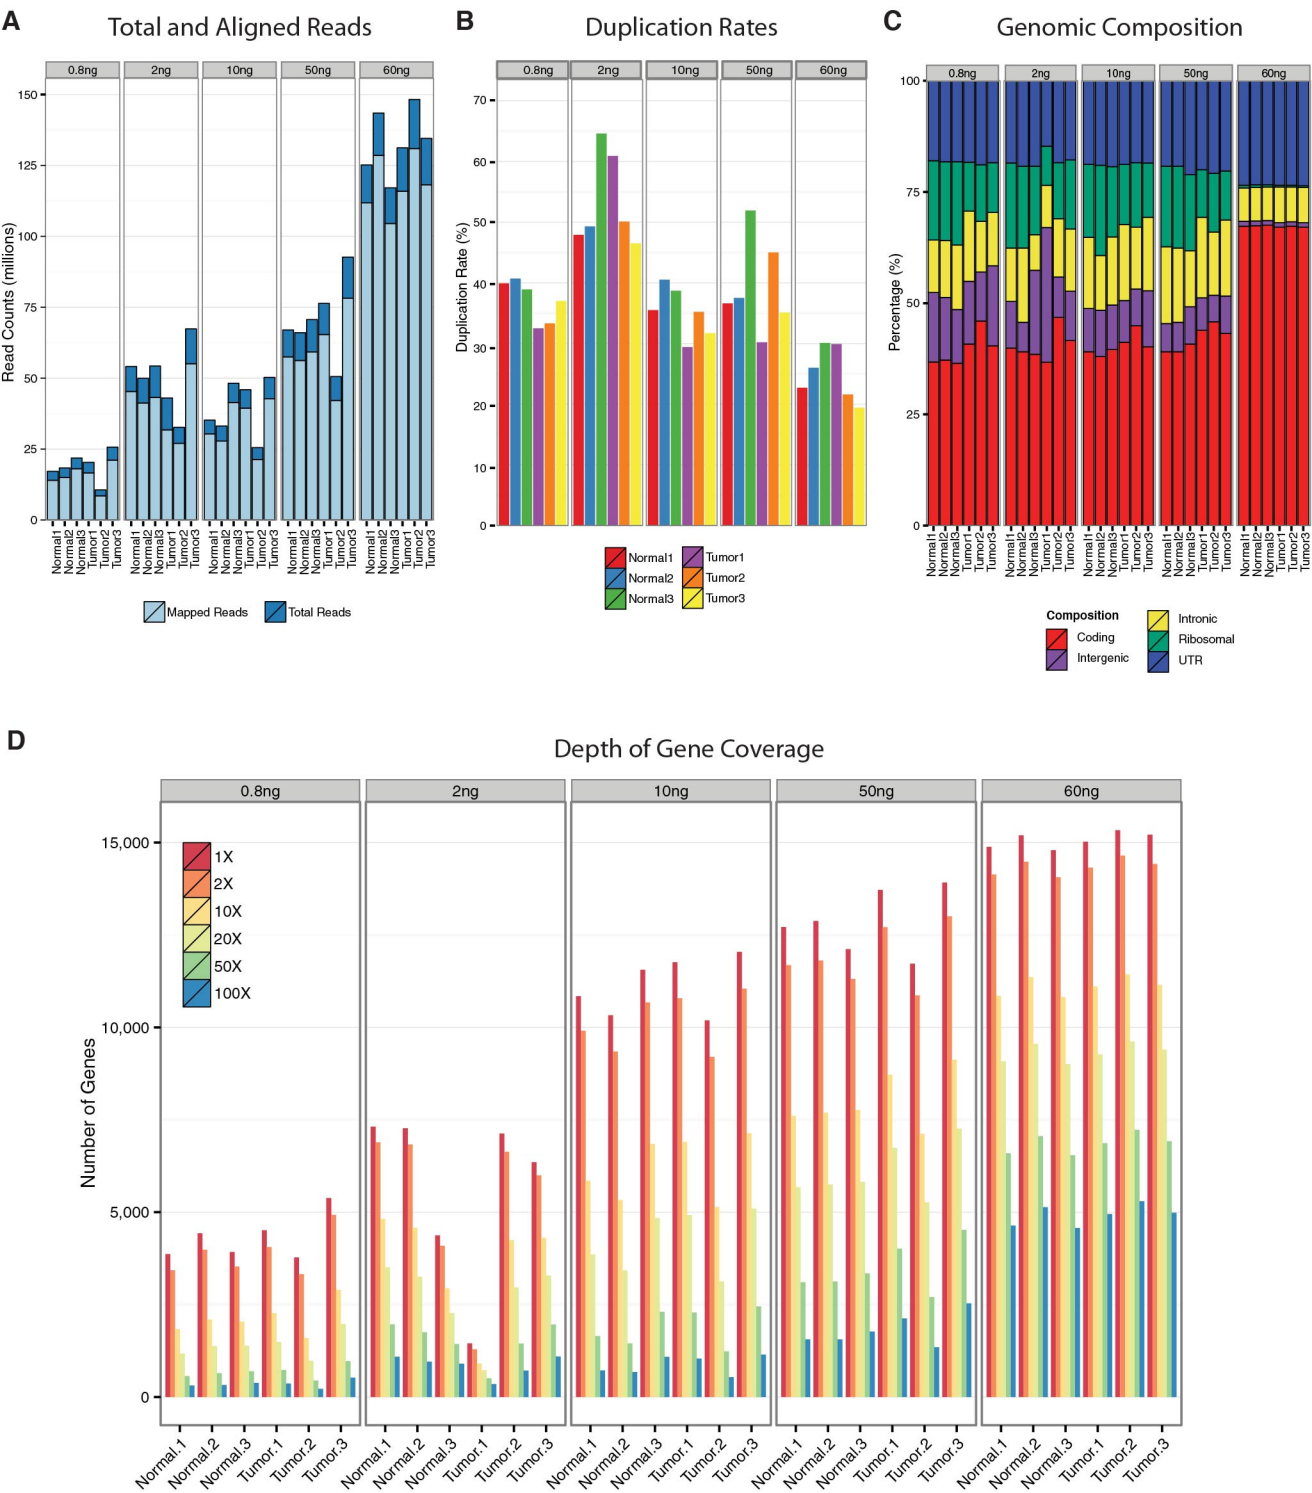

Supplement: mmc7.pdf [file mmc7.pdf]

# Supplementary Figure S8

## Log10 P-values

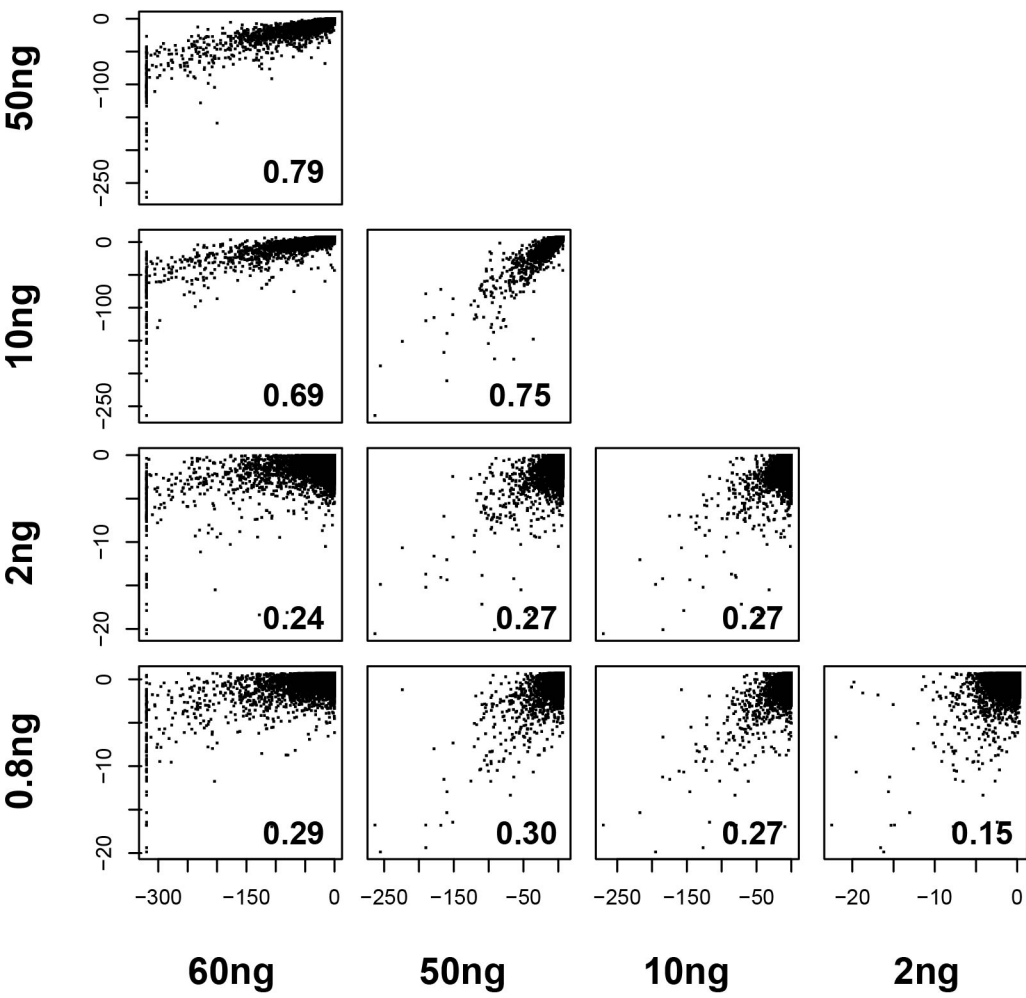

Supplement: mmc8.pdf [file mmc8.pdf]
